# Supplementary material for: Human Norovirus Evolution in a Chronically Infected Host
Source: PubMed Central journal article supplement (PMC5371696; doi:10.1128/msphere.00352-16), 2017-03-29

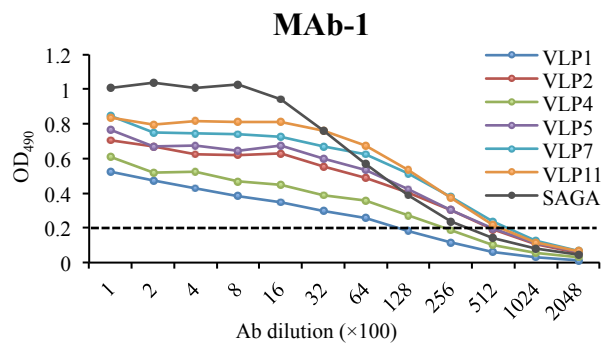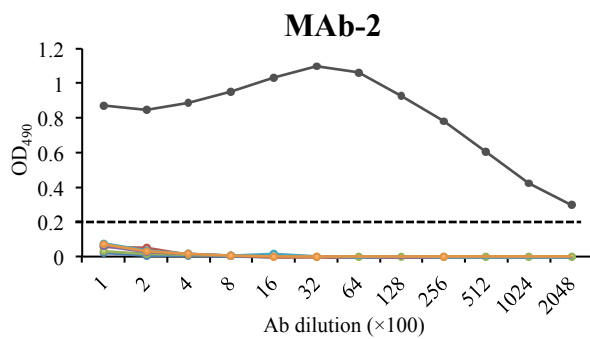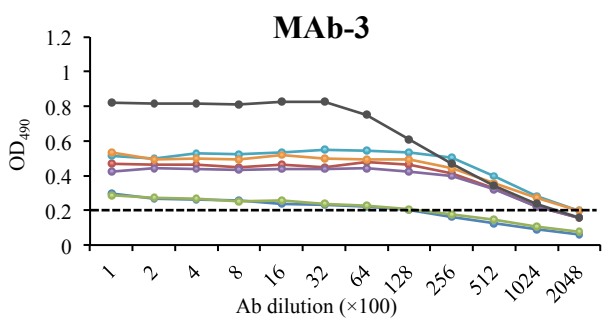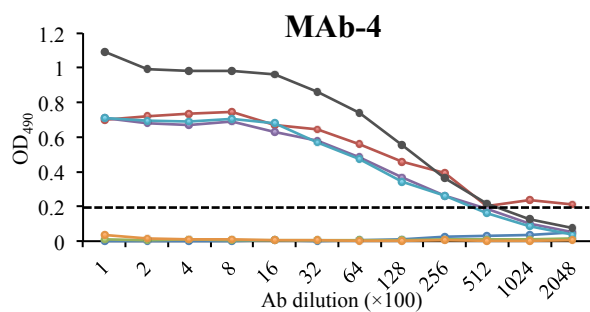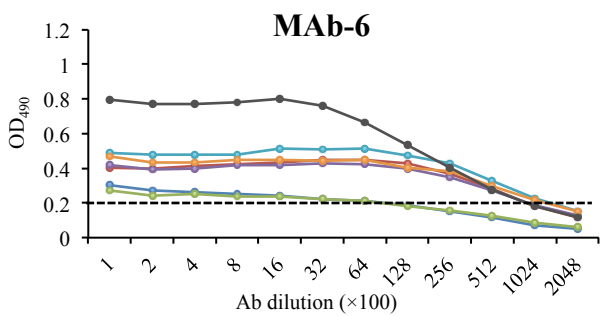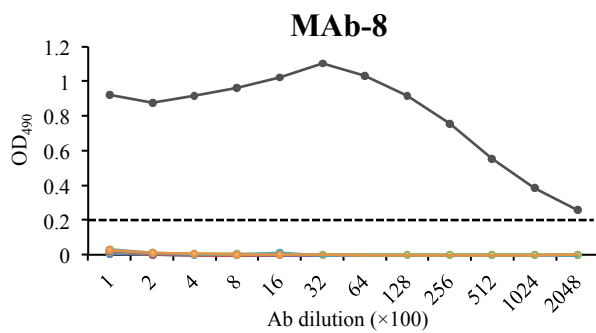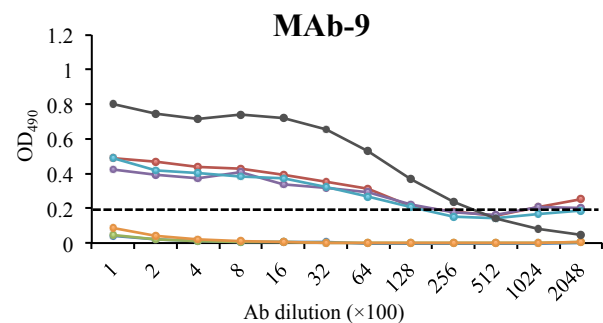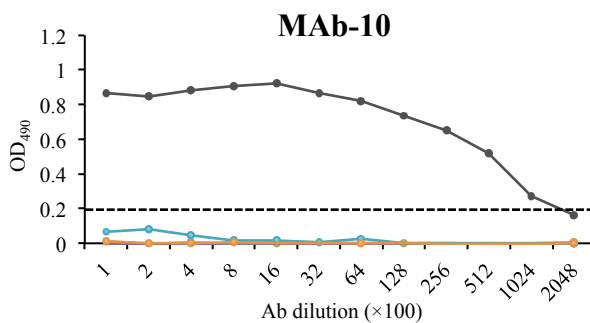

Supplement: sph002172257sf1.pdf [file sph002172257sf1.pdf]
